# Supplementary material for: Importance of serial changes in biomarkers in idiopathic pulmonary fibrosis
Source: PubMed Central journal article supplement — ERJ Open Res. 2017 Aug 30;3(3):00019-2016. doi: 10.1183/23120541.00019-2016 (PMC5576222; doi:10.1183/23120541.00019-2016), 2017-08-30
Supplement: 00019-2016_supp.pdf [file 00019-2016_supp.pdf]

## Supplemental data

**Table S1.** Comparison of the first time point between patients with and without the second time point.

|                                     | Patients with the second time point | Patients without the second time point | <i>P</i> value |
|-------------------------------------|-------------------------------------|----------------------------------------|----------------|
| n                                   | 75                                  | 22                                     |                |
| Age, years                          | 69.9 ± 8.7                          | 70.6 ± 9.1                             | 0.69           |
| Male, %                             | 64 (85.3)                           | 18 (81.8)                              | 0.74           |
| Smoking, current / previous / never | 7 (9.3)/62 (82.7)/6 (8.0)           | 1 (4.6)/16 (72.7)/5 (22.7)             | 0.14           |
| Biopsy-proven, %                    | 16 (21.3)                           | 3 (13.6)                               | 0.55           |
| Treated with pirfenidone            | 11 (14.7)                           | 0 (0.0)                                | 0.056          |
| Treated with CS and/or IS           | 13 (17.3)                           | 1 (4.6)                                | 0.13           |
| %FVC, %                             | 83.8 ± 21.7                         | 80.4 ± 21.0                            | 0.71           |
| %DL <sub>CO</sub> , %               | 41.9 ± 11.5                         | 44.0 ± 16.7                            | 0.71           |

|                   |             |             |      |
|-------------------|-------------|-------------|------|
| CPI               | 49.1 ± 11.2 | 50.0 ± 12.5 | 0.67 |
| Serum KL-6, U/mL  | 1121 ± 733  | 1006 ± 732  | 0.20 |
| Serum SP-D, ng/mL | 302 ± 224   | 238 ± 145   | 0.43 |

---

The data are shown as the mean ± standard deviation or number (%).

Abbreviations: CS, corticosteroid; IS, immunosuppressive agent; %FVC, percentage of the predicted forced vital capacity; %DL<sub>CO</sub>, percentage of the predicted diffusing capacity of the lung for carbon monoxide; CPI, composite physiologic index; KL-6, Krebs von den Lungen-6; SP-D, surfactant protein-D.

**Table S2.** Univariate and multivariate regression analyses of overall mortality using Cox proportional hazards models (categorical models).

| Variables               | Univariate |             |                | Multivariate |             |                |
|-------------------------|------------|-------------|----------------|--------------|-------------|----------------|
|                         | HR         | 95% CI      | <i>P</i> value | HR           | 95% CI      | <i>P</i> value |
| <b>Baseline</b>         |            |             |                |              |             |                |
| %FVC < 70%              | 3.62       | 1.34 – 10.2 | 0.01           | 2.44         | 0.74 – 8.36 | 0.14           |
| %DL <sub>CO</sub> < 40% | 7.54       | 2.04 – 48.6 | < 0.01         | 4.94         | 1.03 – 36.5 | 0.046          |
| KL-6 > 1000 U/mL        | 2.41       | 1.03 – 6.08 | 0.04           | 1.29         | 0.36 – 5.44 | 0.70           |
| <b>Six-month change</b> |            |             |                |              |             |                |
| KL-6 ≥ 140 U/mL         | 2.97       | 1.26 – 7.14 | 0.01           | 3.95         | 1.20 – 14.9 | 0.02           |

Abbreviations: HR, hazard ratio; CI, confidence interval; %FVC, percentage of the predicted forced vital capacity; %DL<sub>CO</sub>, percentage of the predicted diffusing capacity of the lung for carbon monoxide; KL-6, Krebs von den Lungen-6.
